# Supplementary material for: Genome and Functional Characterization of Colonization Factor Antigen I- and CS6-Encoding Heat-Stable Enterotoxin-Only Enterotoxigenic Escherichia coli Reveals Lineage and Geographic Variation
Source: PubMed Central journal article supplement (PMC6446980; doi:10.1128/msystems.00329-18), 2019-01-15
Supplement: mSystems.00329-18-sf002.pdf [file mSystems.00329-18-sf002.pdf]

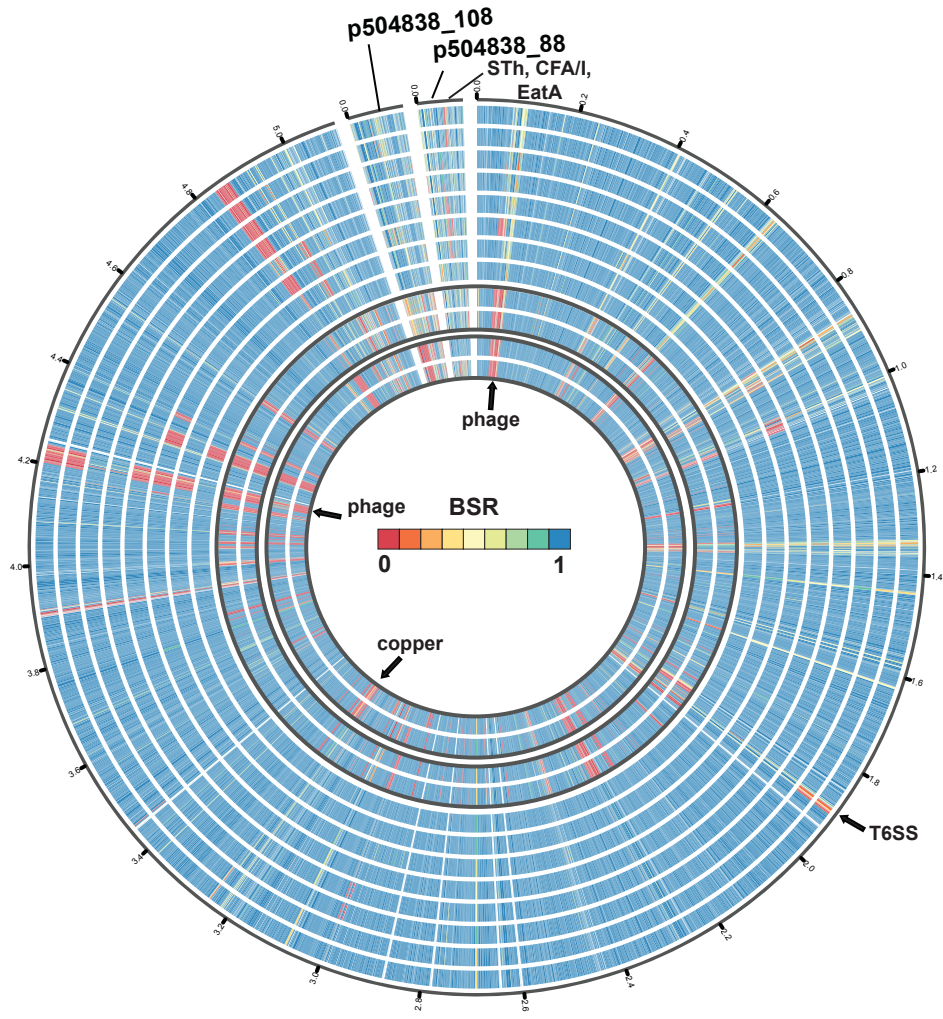

**Panel A.**

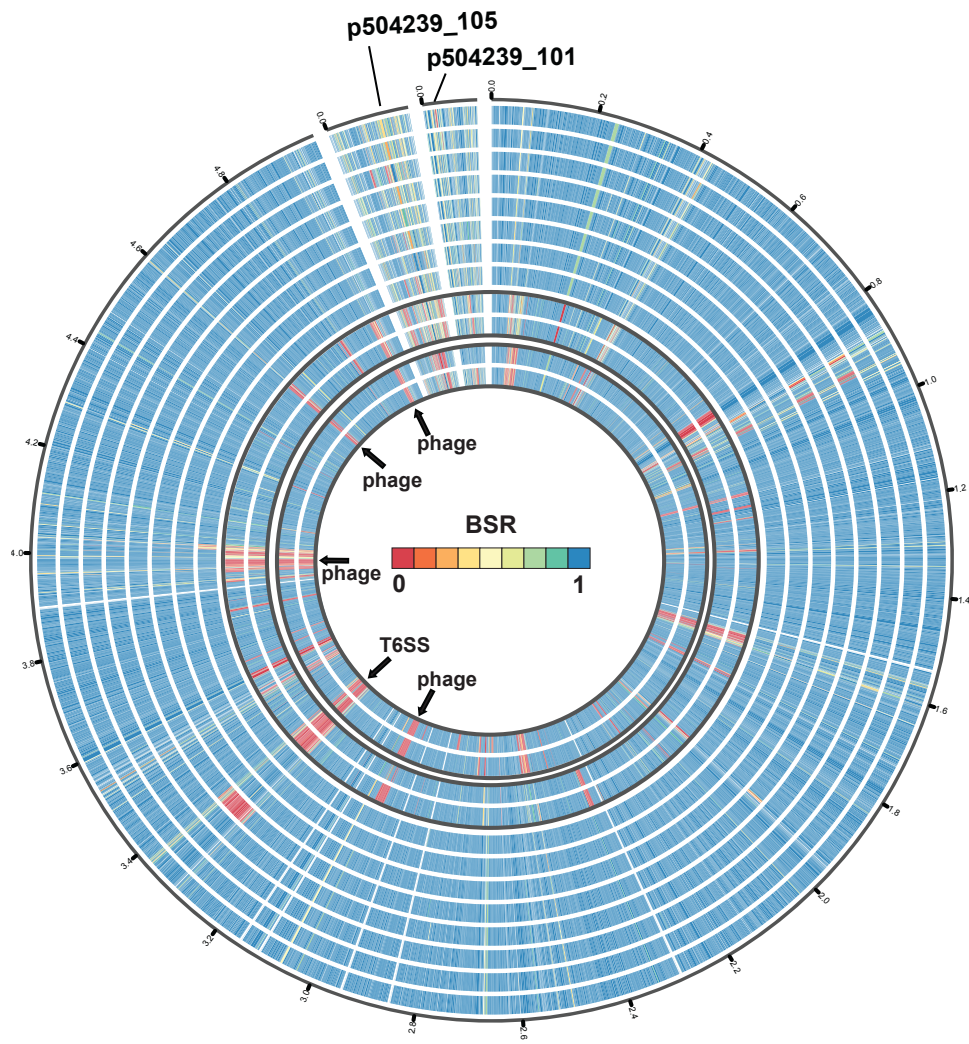

Panel B.

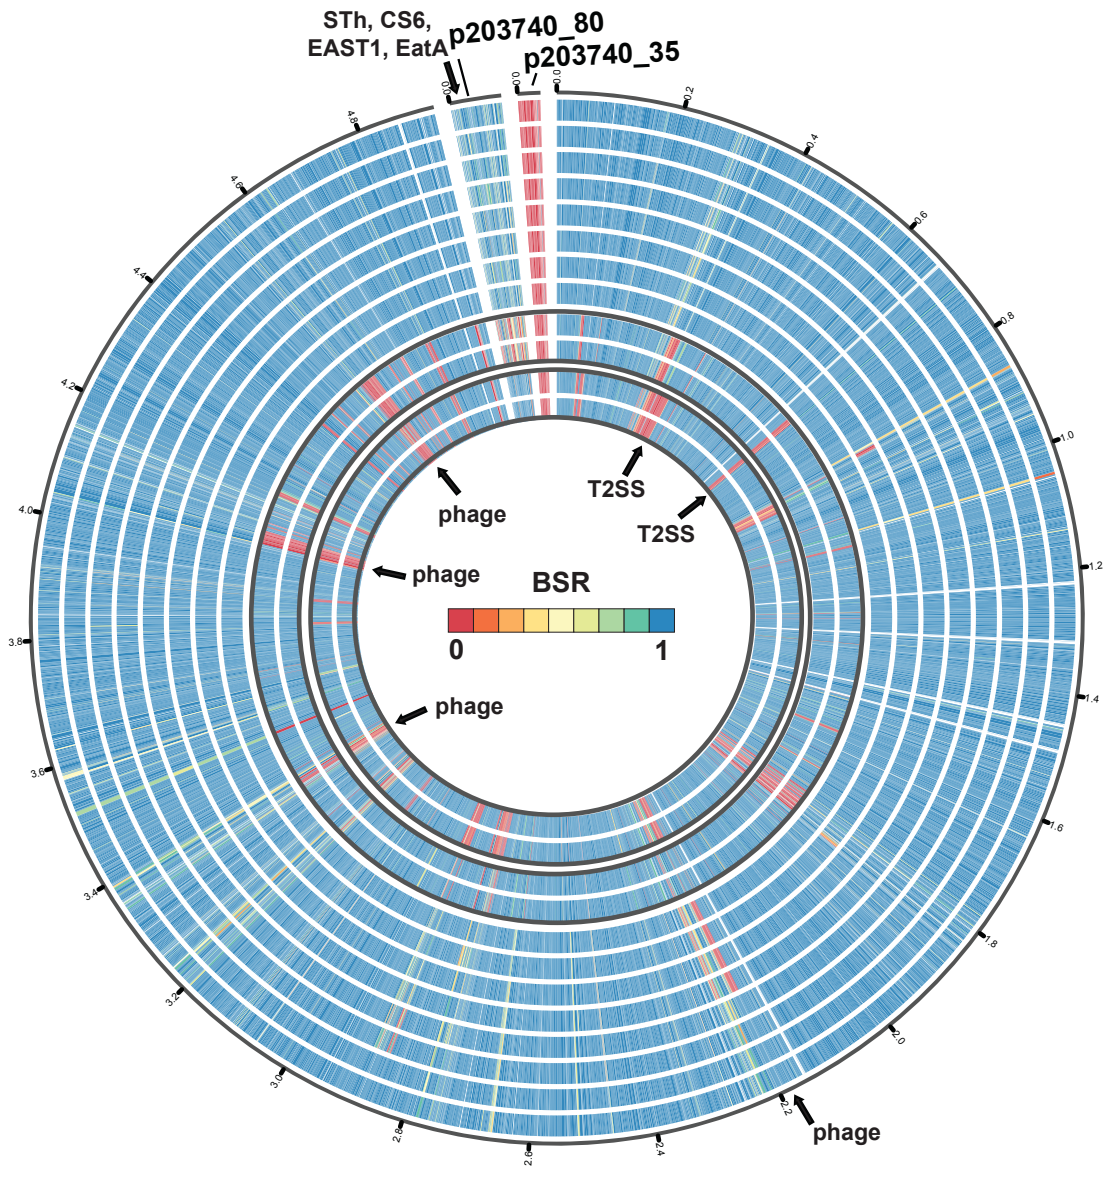

Panel C.



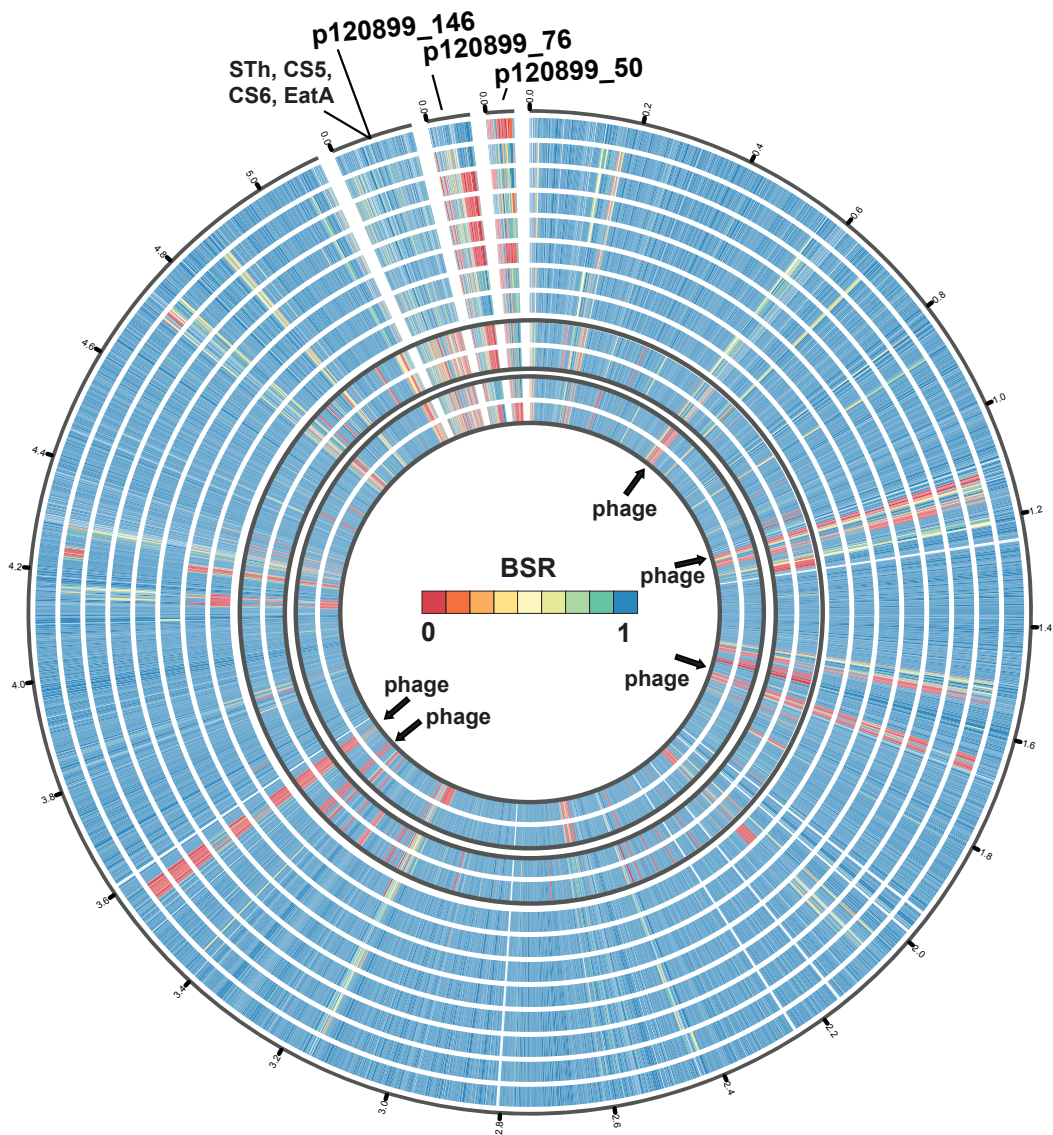

Panel D.



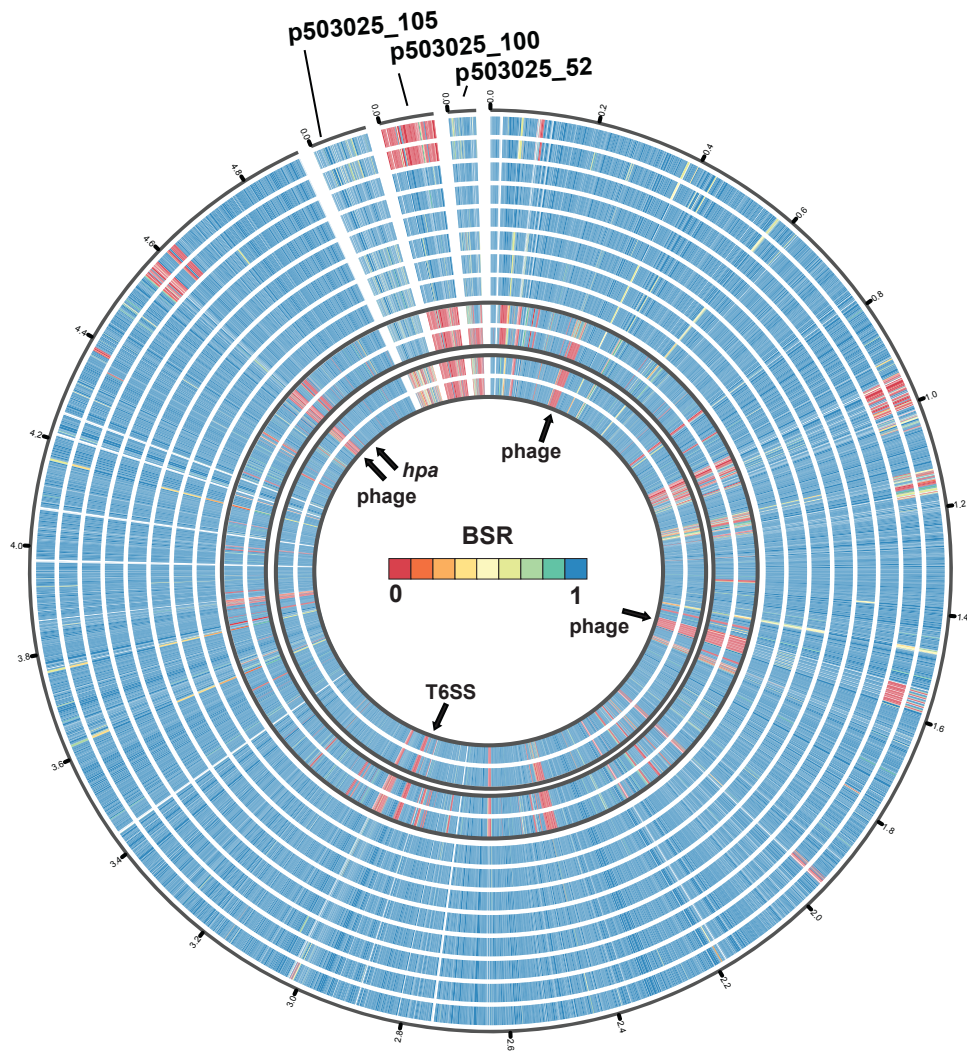

Panel E.
